# Supplementary material
Source: PubMed Central journal article supplement (PMC3105678)

#### Supplementary Material 4 - Effect of genome window size on minimum tetra Pearson correlation coefficient cut-off

To reach a balance between highest possible correlation coefficients (long genome fragments) and most resolved tetra signature (short genome fragments), multiple lengths were tested. The final window size used was 10 kb, which allowed for a 0.61 Pearson coefficient cut-off.

Effect of genome window size on minimum tetra Pearson correlation coefficient cut-off

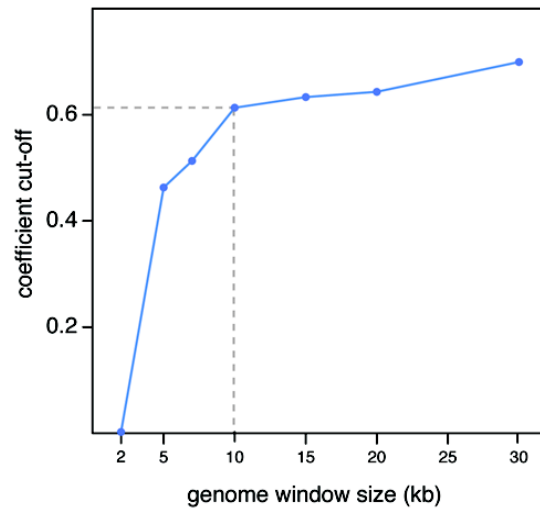

Supplement: ismej201094x4.pdf [file ismej201094x4.pdf]
