# Supplementary material
Source: PubMed Central journal article supplement (PMC3105678)

**Supplementary Material 5 - Pseudoalteromonas phage H105/1 virion and plaque morphology**

(a) Transmission electron micrograph of Pseudoalteromonas phage H105/1 (Wichels *et al*, 1998). (b) Plaque formation of Pseudoalteromonas phage H105/1 on *Pseudoalteromonas* sp. H105. Arrow indicates area of hazy halo around clear plaque.

**(a) TEM of Pseudoalteromonas Phage H105/1**

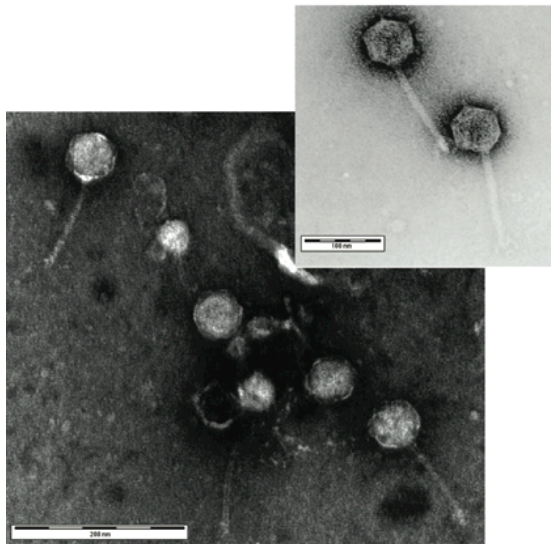

**(b) Pseudoalteromonas Phage H105/1 haloed plaques**

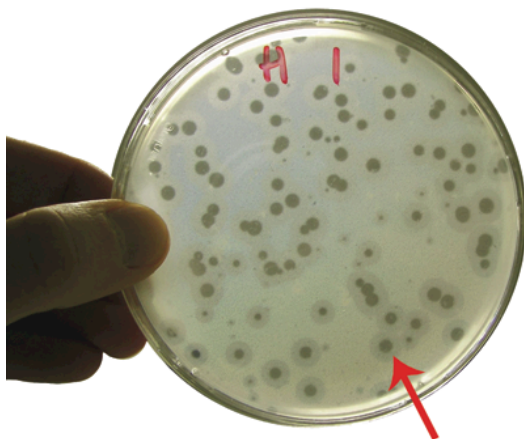

Supplement: ismej201094x5.pdf [file ismej201094x5.pdf]
